# Supplementary material for: Identification of T-cell Receptors Targeting KRAS-Mutated Human Tumors
Source: Oxford University Press journal article supplement (doi:10.1158/2326-6066.cir-15-0188), 2016-01-11
Supplement: 23266066cir150188-sup-153440_1_supp_0_nzcsmb.doc [file 23266066cir150188-sup-153440_1_supp_0_nzcsmb.doc]

**Supplementary Table 2:** Predicted HLA-binding affinity of mutated KRAS G12D and KRAS G12V*

| Input sequence | allele | length | peptide | Binding affinity (nM) |
| --- | --- | --- | --- | --- |
| KRAS G12D | HLA-A*11:01 | 9 | VVGADGVGK | 194 |
|  | HLA-A*11:01 | 10 | VVVGADGVGK | 220 |
|  | HLA-A*68:01 | 10 | VVVGADGVGK | 248 |
| KRAS G12V | HLA-A*11:01 | 9 | VVGAVGVGK | 50 |
|  | HLA-A*11:01 | 10 | VVVGAVGVGK | 71 |
|  | HLA-A*03:01 | 10 | VVVGAVGVGK | 133 |
|  | HLA-A*68:01 | 10 | VVVGAVGVGK | 136 |
|  | HLA-A*03:01 | 9 | VVGAVGVGK | 234 |

*Analyzed by NetMHC version 3.4: <http://www.cbs.dtu.dk/services/NetMHC/>
